# Supplementary material for: Effects of External Stimulation on Psychedelic State Neurodynamics
Source: PubMed Central journal article supplement (PMC10853937; doi:10.1021/acschemneuro.3c00289), 2024-01-12
Supplement: cn3c00289_si_001.pdf [file cn3c00289_si_001.pdf]

# 1 **Supporting Information for**

## 2 **Effects of External Stimulation on Psychedelic State Neurodynamics**

3 **Pedro A.M. Mediano\***, **Fernando E. Rosas\***, Christopher Timmermann, Leor Roseman, David J. Nutt, Amanda Feilding, Mendel  
4 Kaelen, Morten L. Kringelbach, Adam B. Barrett, Anil K. Seth, Suresh Muthukumaraswamy, Daniel Bor, and  
5 **Robin L. Carhart-Harris**

6 **Corresponding authors: Pedro A.M. Mediano and Fernando E. Rosas.**  
7 **E-mail: p.mediano@imperial.ac.uk, f.rosas@sussex.ac.uk**

### 8 **This PDF file includes:**

- 9 Supporting information text
- 10 Figs. S1 to S5
- 11 Tables S1 to S12
- 12 References for SI reference citations

## 13 Supporting Information Text

### 14 Additional controls on the interaction between drug and condition

15 In Figure 1 of the main text, we report as the main finding of the paper the result that there exists a negative drug $\times$ eyes  
16 interaction effect on whole-brain average LZ. To confirm these results we performed a number of additional controls (all agreeing  
17 with our conclusions), described here and reported in the tables below:

- 18 (1) Table S1 presents the results of a LME model in which the condition variable is an integer coding of external stimulation,  
19 according to the following order: closed (0), music (1), open (2), and video (3). For the LME, the condition was treated  
20 as a continuous variable. This is the model shown in Figure 1b of the main text.
- 21 (2) Table S2 shows the result of a two-way ANOVA run on the drug and condition variables, with the condition variable  
22 being a four-valued discrete variable.
- 23 (3) Table S3 presents the replication of the results in Table 1 of the main text on data under a more conservative filtering —  
24 a low-pass 4<sup>th</sup>-order Butterworth filter with cut-off frequency at 30 Hz.
- 25 (4) Table S4 presents the results of a LME model controlling for ordering effects between the stimulus and non-stimulus  
26 sessions — i.e. run on a different set of data in which the eyes-closed and eyes-open conditions were recorded after the  
27 music and video conditions, respectively.

### 28 Sensitivity of correlations to the external condition

29 Here we provide additional information about the results in Figure 3 of the main text, related to how external stimulation  
30 affects correlation (i) between VAS scores and LZ in the considered ROIs, and (ii) between LZ in each pair of ROIs. To study  
31 this, we computed the between-subjects correlation between VAS and LZ changes ( $LZ_{LSD} - LZ_{PLA}$ ), in each experimental  
32 condition (Figure S1). To draw quantitative conclusions, we constructed a multivariate regression model using the correlation  
33 coefficients as target variables and stimuli and eye opening as predictors. We constructed two separate models: one using  
34 VAS-VAS correlations as target (Table S5), and one using VAS-ROI correlations as target (Table S6). For completeness, we also  
35 verified these results percent signal change (i.e.  $(LZ_{LSD} - LZ_{PLA})/LZ_{PLA}$ ), with virtually identical results (Tables S7 and S8).

36 In order to discard potential ordering effects driving this results, we re-ran these analyses on the same order-flipped data  
37 used in item (4) above, with nearly identical results (Figure S2). The numerical results of these models are presented in  
38 Tables S9 and S10.

### 39 Relation between LZ complexity and alpha power

40 Decreased power in the alpha band is one of the most systematic spectral effects reported in the M/EEG psychedelics  
41 literature (1–3). This has raised questions regarding to what extent is the LSD-induced increase in LZ merely a reflection of  
42 the corresponding alpha power suppression. To touch briefly on this issue, here we show that while alpha suppression shows a  
43 behaviour similar to LZ when comparing across gross state changes (Figures S3 and S4), it is substantially less correlated with  
44 subjective reports than LZ (Figure S5).

45 More specifically, first Figure S3 presents a comparison between LZ and alpha power for each subject in the placebo session,  
46 for each of the four experimental conditions. As expected, alpha power is inversely related to LZ, with richer stimuli inducing  
47 stronger suppression. Additionally, Figure S4 shows that when measured with alpha suppression the drug also has an interaction  
48 with external stimulation (c.f. Figure 1b in the main text). Quantitatively, LME modelling reveals that both the drug and eye  
49 opening have significant negative effects on alpha power, and that they have a significant positive interaction (Table S12).

50 Finally, we explored the predictive capability of alpha changes in all ROIs to predict VAS ratings (Figure S5). In this  
51 case, unlike the above, the results of alpha suppression do not resemble those of LZ: while some relationships survive the  
52 multiple-comparisons correction, alpha power seems to be far less capable of predicting subjective reports than LZ (c.f. Figure 4  
53 in the main text). This suggests LZ to be a more sensitive, and therefore more suitable, marker of the psychedelic experience  
54 — although a full analysis decomposing the spectral components of the LZ difference is needed to shed more light on the  
55 matter (4).

## 56 References

- 57 1. Suresh D Muthukumaraswamy, Robin L Carhart-Harris, Rosalyn J Moran, Matthew J Brookes, Tim M Williams, David  
58 Errtizoe, Ben Sessa, Andreas Papadopoulos, Mark Bolstridge, Krish D Singh, et al. Broadband cortical desynchronization  
59 underlies the human psychedelic state. *Journal of Neuroscience*, 33(38):15171–15183, 2013.
- 60 2. Robin L Carhart-Harris, Suresh Muthukumaraswamy, Leor Roseman, Mendel Kaelen, Wouter Droog, Kevin Murphy, Enzo  
61 Tagliazucchi, Eduardo E Schenberg, Timothy Nest, Csaba Orban, et al. Neural correlates of the LSD experience revealed  
62 by multimodal neuroimaging. *Proceedings of the National Academy of Sciences*, 113(17):4853–4858, 2016.
- 63 3. Carla Pallavicini, Martina G Vilas, Mirta Villarreal, Federico Zamberlan, Suresh Muthukumaraswamy, David Nutt, Robin  
64 Carhart-Harris, and Enzo Tagliazucchi. Spectral signatures of serotonergic psychedelics and glutamatergic dissociatives.  
65 *NeuroImage*, 200:281–291, 2019.

- 66 4. Pedro AM Mediano, Fernando E Rosas, Adam B Barrett, and Daniel Bor. Decomposing spectral and phasic differences in  
67 nonlinear features between datasets. *Physical Review Letters*, 127(12):124101, 2021.

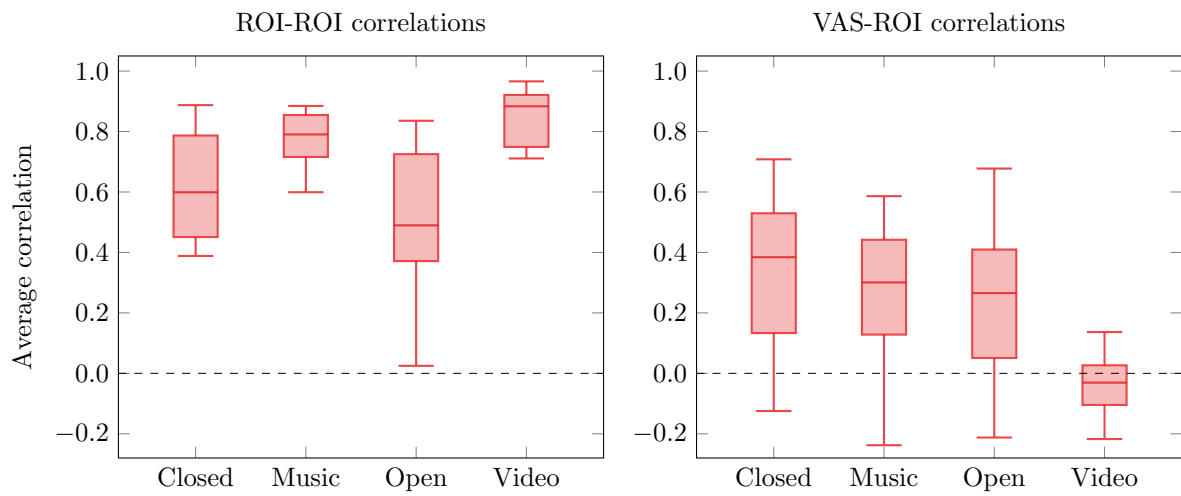

Fig. S1. Between-subjects correlation between pairs of ROIs (left) and ROIs and VAS items (right).

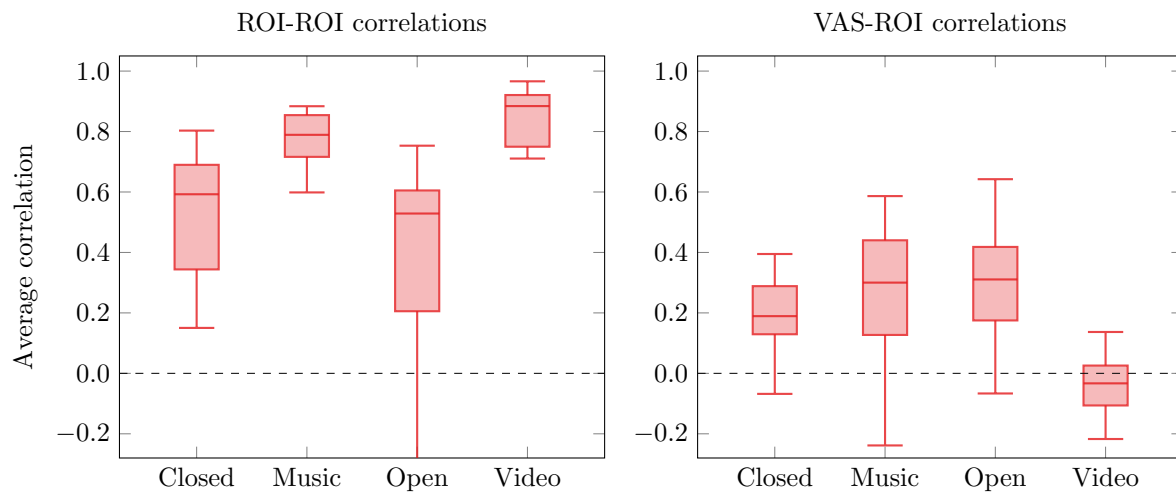

**Fig. S2.** Between-subjects correlation between pairs of ROIs (left) and ROIs and VAS items (right), controlling for ordering effects.

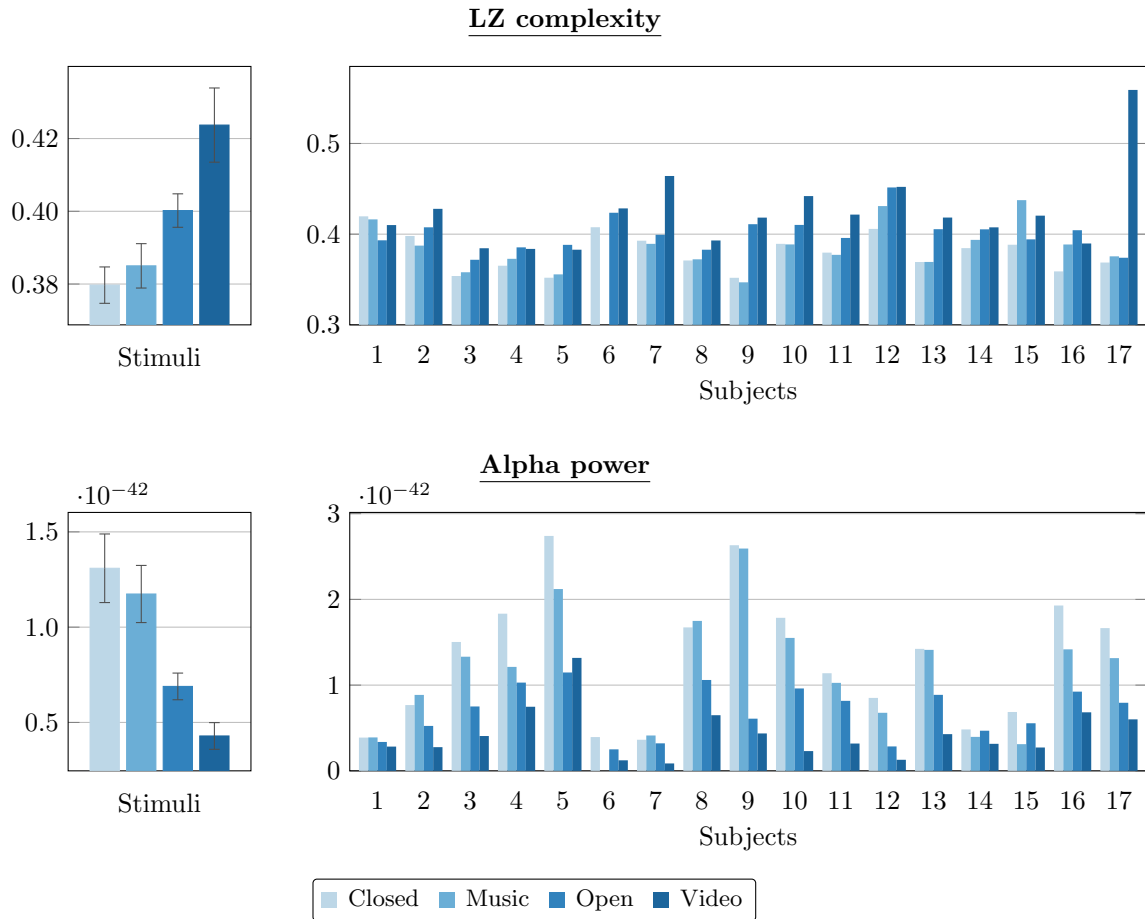

**Fig. S3.** Data from the non-drug placebo condition: External stimulation increases LZ complexity (top) and suppresses alpha power (bottom). For each measure, data are provided per subject (right) and averaged across subjects (left; error bar is standard error). LZ complexity is reported in bits/sample, and alpha power in  $T^2$ .

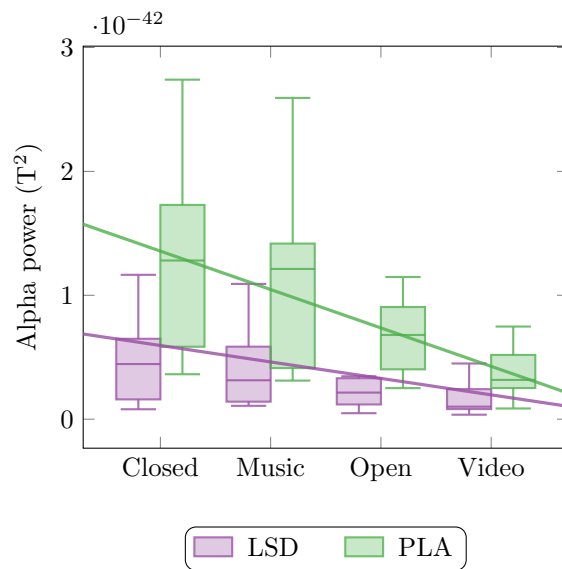

Fig. S4. Whole-brain average alpha (8-13 Hz) power for both LSD and placebo sessions, for all experimental conditions.

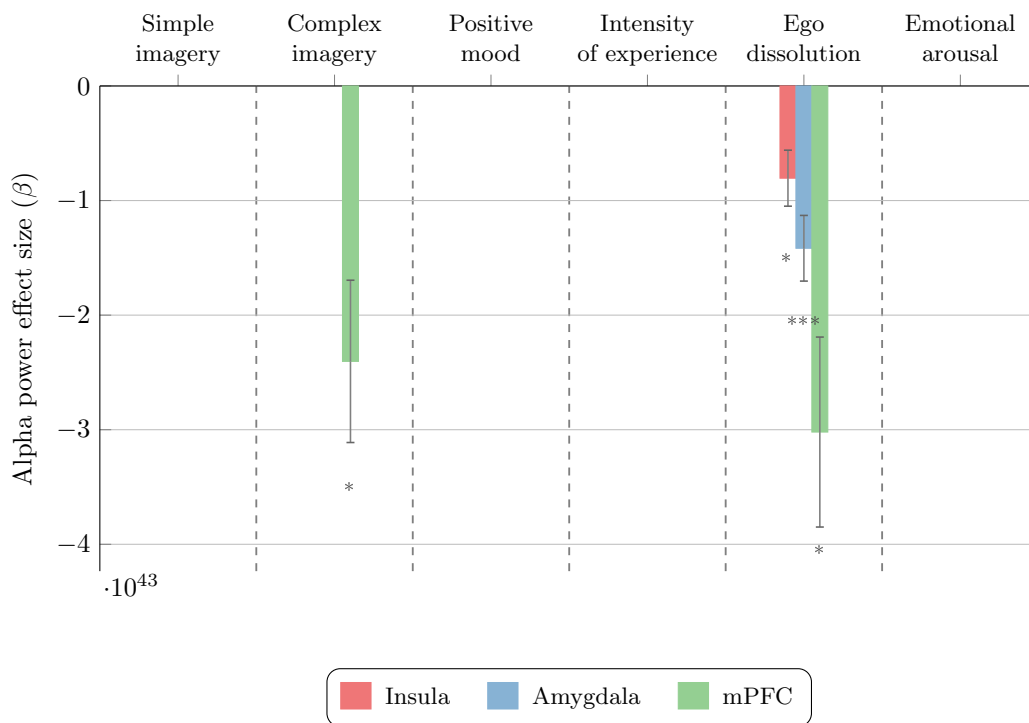

**Fig. S5.** Estimates, standard error, and FDR-corrected statistical significance (\*:  $p < 0.05$ , \*\*:  $p < 0.01$ , \*\*\*:  $p < 0.001$ ), of the effect of the alpha power differences (LSD-PLA), averaged over various ROIs, for predicting VAS differences (LSD-PLA). ROIs not shown had no significant effect from alpha power on any VAS item.



**Table S1. Coefficients of LME model predicting average LZ with an integer-coded condition variable.**

|                                           | $\beta$ | SE    | $p$    |
|-------------------------------------------|---------|-------|--------|
| <b>Drug</b>                               | 0.050   | 0.005 | <0.001 |
| <b>Condition</b>                          | 0.012   | 0.002 | <0.001 |
| <b>Drug <math>\times</math> Condition</b> | -0.007  | 0.002 | 0.009  |

**Table S2. Results of a two-way ANOVA on average LZ using an integer-coded condition variable.**

|                         | Mean Square | F     | <i>p</i> |
|-------------------------|-------------|-------|----------|
| <b>Drug</b>             | 0.050       | 107.4 | <0.001   |
| <b>Condition</b>        | 0.013       | 27.0  | <0.001   |
| <b>Drug × Condition</b> | 0.002       | 5.0   | 0.027    |

**Table S3. Coefficients of LME model predicting average LZ on data low-pass filtered at 30 Hz.**

|                  | $\beta$                | SE                    | $p$    |
|------------------|------------------------|-----------------------|--------|
| <b>Drug</b>      | $8.44 \times 10^{-3}$  | $9.67 \times 10^{-4}$ | <0.001 |
| <b>Stimulus</b>  | $1.60 \times 10^{-3}$  | $6.80 \times 10^{-4}$ | 0.021  |
| <b>Eyes</b>      | $5.28 \times 10^{-3}$  | $9.61 \times 10^{-4}$ | <0.001 |
| <b>Drug×Eyes</b> | $-4.56 \times 10^{-3}$ | $1.36 \times 10^{-3}$ | 0.001  |

**Table S4. Coefficients of LME model predicting average LZ controlling for ordering effects.**

|                                      | $\beta$ | SE    | $p$    |
|--------------------------------------|---------|-------|--------|
| <b>Drug</b>                          | 0.044   | 0.004 | <0.001 |
| <b>Stimulus</b>                      | 0.009   | 0.003 | 0.005  |
| <b>Eyes</b>                          | 0.021   | 0.004 | <0.001 |
| <b>Drug <math>\times</math> Eyes</b> | -0.012  | 0.006 | 0.048  |

**Table S5. Coefficients of multivariate linear model for predicting VAS-ROI correlation.  
Adjusted-R=0.28, F(3,116)=16.59, p<0.001.**

|                                          | $\beta$ | SE   | $p$   |
|------------------------------------------|---------|------|-------|
| <b>Stimulus</b>                          | - 0.07  | 0.05 | 0.168 |
| <b>Eyes</b>                              | - 0.08  | 0.05 | 0.127 |
| <b>Stimulus <math>\times</math> Eyes</b> | -0.21   | 0.08 | 0.006 |

**Table S6. Coefficients of multivariate linear model for predicting ROI-ROI correlation.  
Adjusted-R=0.42, F(3,116)=29.89, p<0.001.**

|                      | $\beta$ | SE   | $p$    |
|----------------------|---------|------|--------|
| <b>Stimulus</b>      | 0.15    | 0.04 | <0.001 |
| <b>Eyes</b>          | -0.10   | 0.04 | 0.011  |
| <b>Stimulus×Eyes</b> | 0.18    | 0.06 | 0.001  |

**Table S7. Coefficients of multivariate linear model for predicting VAS-ROI correlation with LZ changes normalised by baseline values. Adjusted-R=0.29, F(3,116)=16.85, p<0.001.**

|                                          | $\beta$ | SE   | $p$   |
|------------------------------------------|---------|------|-------|
| <b>Stimulus</b>                          | - 0.07  | 0.05 | 0.108 |
| <b>Eyes</b>                              | - 0.08  | 0.05 | 0.134 |
| <b>Stimulus <math>\times</math> Eyes</b> | -0.22   | 0.07 | 0.007 |

**Table S8. Coefficients of multivariate linear model for predicting ROI-ROI correlation with LZ changes normalised by baseline values. Adjusted-R=0.42, F(3,116)=29.89, p<0.001.**

|                                          | $\beta$ | SE   | $p$   |
|------------------------------------------|---------|------|-------|
| <b>Stimulus</b>                          | 0.13    | 0.04 | 0.002 |
| <b>Eyes</b>                              | -0.13   | 0.04 | 0.001 |
| <b>Stimulus <math>\times</math> Eyes</b> | 0.18    | 0.06 | 0.002 |



**Table S9. Coefficients of multivariate linear model for predicting VAS-ROI correlation controlling for ordering effects.  
Adjusted-R=0.27, F(3,116)=15.63, p<0.001.**

|                      | $\beta$ | SE   | $p$    |
|----------------------|---------|------|--------|
| <b>Stimulus</b>      | - 0.07  | 0.04 | 0.085  |
| <b>Eyes</b>          | - 0.07  | 0.05 | 0.139  |
| <b>Stimulus×Eyes</b> | -0.37   | 0.07 | <0.001 |

**Table S10. Coefficients of multivariate linear model for predicting ROI-ROI correlation controlling for ordering effects.  
Adjusted-R=0.47, F(3,116)=35.91, p<0.001.**

|                      | $\beta$ | SE   | $p$    |
|----------------------|---------|------|--------|
| <b>Stimulus</b>      | 0.24    | 0.05 | <0.001 |
| <b>Eyes</b>          | -0.15   | 0.05 | 0.004  |
| <b>Stimulus×Eyes</b> | 0.23    | 0.07 | 0.002  |

**Table S11. Model FDR-corrected  $p$ -value and coefficients (mean  $\pm$  SE) of LME models predicting VAS changes from LZ changes in each ROI. Models for all VAS,ROI pairs were fitted following the procedure in Materials and Methods, and those with  $p < 0.05$  are shown here.**

| VAS             | ROI         | $p$ -value | LZ                | Stimulus          | Eyes             | LZ $\times$ Stimulus | LZ $\times$ Eyes |
|-----------------|-------------|------------|-------------------|-------------------|------------------|----------------------|------------------|
| Simple imagery  | Whole brain | 0.002      | 116.4 $\pm$ 34.9  | 1.94 $\pm$ 0.78   | <i>n/a</i>       | <i>n.s.</i>          | <i>n/a</i>       |
|                 | pDMN        | 0.003      | 111.6 $\pm$ 31.9  | 1.68 $\pm$ 0.83   | <i>n/a</i>       | <i>n.s.</i>          | <i>n/a</i>       |
|                 | Insula      | < 0.001    | 85.8 $\pm$ 20.1   | 42.51 $\pm$ 0.68  | <i>n/a</i>       | <i>n.s.</i>          | <i>n/a</i>       |
|                 | Visual      | < 0.001    | 135.1 $\pm$ 31.2  | 1.94 $\pm$ 0.77   | <i>n/a</i>       | <i>n.s.</i>          | <i>n/a</i>       |
|                 | Auditory    | 0.032      | 63.4 $\pm$ 26.0   | 1.45 $\pm$ 0.89   | <i>n/a</i>       | <i>n.s.</i>          | <i>n/a</i>       |
| Complex imagery | Whole brain | 0.012      | 94.0 $\pm$ 34.2   | 0.02 $\pm$ 1.04   | <i>n/a</i>       | <i>n.s.</i>          | <i>n/a</i>       |
|                 | pDMN        | 0.006      | 94.9 $\pm$ 28.7   | -0.20 $\pm$ 1.01  | <i>n/a</i>       | <i>n.s.</i>          | <i>n/a</i>       |
|                 | Insula      | 0.023      | 55.7 $\pm$ 21.3   | 0.36 $\pm$ 1.04   | <i>n/a</i>       | <i>n.s.</i>          | <i>n/a</i>       |
|                 | Visual      | 0.006      | 109.2 $\pm$ 30.9  | -0.002 $\pm$ 0.89 | <i>n/a</i>       | <i>n.s.</i>          | <i>n/a</i>       |
|                 | Auditory    | 0.006      | 77.1 $\pm$ 21.4   | -0.51 $\pm$ 1.05  | <i>n/a</i>       | <i>n.s.</i>          | <i>n/a</i>       |
| Positive mood   | Whole brain | 0.027      | 50.6 $\pm$ 22.2   | 1.19 $\pm$ 0.91   | -1.70 $\pm$ 0.96 | <i>n.s.</i>          | <i>n.s.</i>      |
|                 | Amygdala    | 0.020      | 44.5 $\pm$ 15.9   | 1.15 $\pm$ 0.89   | -1.62 $\pm$ 0.94 | <i>n.s.</i>          | <i>n.s.</i>      |
|                 | Visual      | 0.020      | 58.0 $\pm$ 19.4   | 1.35 $\pm$ 0.90   | -1.85 $\pm$ 0.91 | <i>n.s.</i>          | <i>n.s.</i>      |
| Intensity       | Visual      | 0.047      | 66.7 $\pm$ 23.6   | 1.06 $\pm$ 0.67   | 2.54 $\pm$ 1.24  | <i>n.s.</i>          | -81.1 $\pm$ 25.1 |
| Ego dissolution | Whole brain | 0.010      | 115.7 $\pm$ 36.3  | 3.74 $\pm$ 1.66   | -0.38 $\pm$ 0.84 | -110.1 $\pm$ 37.1    | <i>n.s.</i>      |
|                 | pDMN        | 0.005      | 114.01 $\pm$ 30.0 | 3.67 $\pm$ 1.47   | -0.65 $\pm$ 0.79 | -107.9 $\pm$ 31.4    | <i>n.s.</i>      |
|                 | Insula      | 0.018      | 59.9 $\pm$ 18.2   | 2.16 $\pm$ 1.40   | -0.24 $\pm$ 0.84 | -53.6 $\pm$ 21.8     | <i>n.s.</i>      |
|                 | Auditory    | 0.003      | 88.8 $\pm$ 21.2   | 4.07 $\pm$ 1.44   | -0.78 $\pm$ 0.78 | -87.7 $\pm$ 23.1     | <i>n.s.</i>      |

**Table S12. Coefficients of LME model predicting average Alpha power change.**

|                  | $\beta$                 | SE                     | $p$       |
|------------------|-------------------------|------------------------|-----------|
| <b>Drug</b>      | $-6.31 \times 10^{-43}$ | $6.81 \times 10^{-44}$ | $< 0.001$ |
| <b>Stimulus</b>  | $-1.40 \times 10^{-43}$ | $4.79 \times 10^{-44}$ | 0.004     |
| <b>Eyes</b>      | $-6.17 \times 10^{-43}$ | $6.77 \times 10^{-44}$ | $< 0.001$ |
| <b>Drug×Eyes</b> | $3.57 \times 10^{-43}$  | $9.56 \times 10^{-44}$ | $< 0.001$ |
